# Supplementary material for: Climate Change and Child Health Inequality: A Review of Reviews
Source: MDPI journal article supplement (doi:10.3390/ijerph182010896), 2021-10-17
Supplement: s1 [file s1]

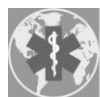

**Table S1.** Summary of Selected Reviews.

| Authors                | Year | Title                                                                                                           | Journal                  | Research Question/Objective                                                                                                                                                                                             | Type of review    | Age of study population(s) | Context | Types of climate change                                                                                | Child health outcomes                                                                                                                                                                |
|------------------------|------|-----------------------------------------------------------------------------------------------------------------|--------------------------|-------------------------------------------------------------------------------------------------------------------------------------------------------------------------------------------------------------------------|-------------------|----------------------------|---------|--------------------------------------------------------------------------------------------------------|--------------------------------------------------------------------------------------------------------------------------------------------------------------------------------------|
| Benevolenza MA, et al. | 2018 | The impact of climate change and natural disasters on vulnerable populations: A systematic review of literature | J Human Behavior Soc Env | Evaluate and summarize the research in peer-reviewed literature that pertains to climate change and natural disasters acting as destabilizing forces hampering the mental and physical health of vulnerable populations | Systematic review | 0-18                       | US      | Weather events; hurricanes; increase in annual numbers and intensity                                   | Emotional and cognitive health, depression and anxiety                                                                                                                               |
| Phalkey RK, et al.     | 2015 | Systematic review of current efforts to quantify the impacts of climate change on undernutrition                | PNAS                     | Assess the scientific evidence base for the impact of climate change on childhood undernutrition (particularly stunting) in subsistence farmers in low-and middle-income countries.                                     | Systematic review | <5 years of age            | LMICs   | Weather events, e.g., rainfall, extreme weather events (floods/droughts), seasonality, and temperature | Childhood undernutrition (stunting)                                                                                                                                                  |
| Ahdoot S, et al.       | 2015 | Global climate change and children's health                                                                     | Pediatrics               | Educate pediatricians on the current knowledge of climate change and its effects on children's health.                                                                                                                  | Review undefined  | 0-18                       | Global  | Rising temperatures                                                                                    | Heat-related mortality & morbidity including preterm birth; asthma & respiratory disease; infectious diseases; death & injury due to extreme weather events; malnutrition; diarrhoea |
| Costello A, et al.     | 2009 | Managing the health effects of climate change                                                                   | The Lancet               | Define climate change, define changes to patterns of illnesses that are affected by climate change.                                                                                                                     | Review undefined  | 0-18                       | Global  | Rising temperatures                                                                                    | Malnutrition, diarrhoea, infectious diseases, respiratory diseases, vector-borne diseases, deaths.                                                                                   |

|                                 |      |                                                                                                                   |                             |                                                                                                                                                                                                      |                                             |                          |          |                                                                                                                                                               |                                                                                                                                                                            |
|---------------------------------|------|-------------------------------------------------------------------------------------------------------------------|-----------------------------|------------------------------------------------------------------------------------------------------------------------------------------------------------------------------------------------------|---------------------------------------------|--------------------------|----------|---------------------------------------------------------------------------------------------------------------------------------------------------------------|----------------------------------------------------------------------------------------------------------------------------------------------------------------------------|
| Assembly of First Nations (AFN) | 2008 | The Health of First Nations Children and the Environment: Discussion Paper                                        | AFN Reports                 | Describe the vulnerability of FN children to environmental hazards including climate change                                                                                                          | Review undefined                            | 0-18                     | Canada   | Rising temperatures                                                                                                                                           | Infant mortality, respiratory infections, skin conditions, diarrhoea, mental health problems                                                                               |
| Davies GI, et al.               | 2014 | Water-borne diseases and extreme weather events in Cambodia: review of impacts and implications of climate change | Int J Env Res Public Health | Characterize the impact of weather events in Cambodia                                                                                                                                                | Non-systematic reviews and opinion articles | 0-18; general population | Cambodia | Weather events, especially floods, droughts and typhoons; Climate change is predicted to increase the frequency and intensity of such events.                 | Water-borne diseases, primarily diarrhoeal disease (i.e., viral and bacterial gastroenteritis, dysentery, cholera and other manifestations of gastrointestinal infections) |
| Ebi, et al.                     | 2007 | Climate change and children                                                                                       | Pediatr Clin N Am           | Review the key issues related to climate change, then reviews climate-sensitive health determinants and outcomes in the context of children's health, considers intergenerational equity issues      | Review undefined                            | 0-18                     | Global   | Rising temperatures; changes in global precipitation patterns, rising sea levels, and increases in the frequency and intensity of some extreme weather events | Mortality from heat events, infectious disease (e.g., Lyme disease), malnutrition, respiratory illnesses                                                                   |
| Goldhagen JL, et al.            | 2019 | Rights, justice, and equity: a global agenda for child health and wellbeing                                       | The Lancet Child & Adolesc  | Present a global agenda for child health and wellbeing as a blueprint for the practice of paediatrics and child health in the domains of clinical care, systems development, and policy formulation. | Review undefined                            | 0-18                     | Global   | Climate change is increasing the frequency and intensity of extreme weather events,                                                                           | Malaria, dengue, leptospirosis, and leishmaniasis; children's stress, anxiety, depression, and post-traumatic stress disorder; Diarrhoea, stunting, vector-borne disease   |

|                  |      |                                                                                                                                             |                      |                                                                                                                                                                                                                                                                                                                                                   |                  |                          |        |                                                                                                                |                                                                                                                                                                                      |
|------------------|------|---------------------------------------------------------------------------------------------------------------------------------------------|----------------------|---------------------------------------------------------------------------------------------------------------------------------------------------------------------------------------------------------------------------------------------------------------------------------------------------------------------------------------------------|------------------|--------------------------|--------|----------------------------------------------------------------------------------------------------------------|--------------------------------------------------------------------------------------------------------------------------------------------------------------------------------------|
| Kistin et al.    | 2010 | Climate change, water resources and child health                                                                                            | Arch Dis Child       | evaluate how the rise in temperature, precipitation, droughts, floods, glacier melt and sea levels resulting from human-induced climate change is affecting the quantity, quality and flow of water resources worldwide and impacting child health through dangerous effects on water supply and sanitation, food production and human migration. | Review undefined | 0-18                     | Global | Floods, storms, drought & extreme weather events                                                               | Water related illnesses - malnutrition, diarrhea,                                                                                                                                    |
| Levy, et al.     | 2015 | Climate change, human rights, and social justice                                                                                            | Ann Global Health.   | Present overview of climate change manifestation and populations who will be most affected                                                                                                                                                                                                                                                        | Review undefined | 0-18; general population | Global | Heat waves, heavy precipitation events, intensity and duration of droughts, intense tropical cycloe, sea level | Heat-related disorders, vector-borne diseases, foodborne and waterborne diseases, respiratory and allergic disorders, malnutrition, collective violence, and mental health problems. |
| McMichael        | 2014 | Climate Change and Children: Health Risks of Abatement inaction, Health Gains from Action                                                   | Children             | Provide overview of climate change manifestation and populations that will be most affected                                                                                                                                                                                                                                                       | Review undefined | 0-18                     | Global | Heat waves, heavy precipitation events, intensity and duration of droughts, intense tropical cycloe, sea level | Under-nutrition and stunting; diarrhoeal, parasitic, vector-borne and other infectious diseases; and allergic respiratory disorders [3,4]. Social and emotional development          |
| Parkes M, et al. | 2010 | Warming Up to the Embodied Context of First Nations Health: A Critical Intervention into and Analysis of Health and Climate Change Research | Int Public Health J. | Review key social determinants of health for Indigenous children and ultimately argue for a broader SDoH framework for Indigenous children.                                                                                                                                                                                                       | Review undefined | 0-18                     | Canada | Warming, loss of permafrost, degradation of habitats & species                                                 | Ecological & socio-cultural determinants of health of First Nations children. Specific outcomes not stated                                                                           |

|                        |      |                                                                                                                                                          |                     |                                                                                                                                                                                       |                  |                                                             |                                   |                                                                                          |                                                                                                                                                                                                                                                                                                                                                                                                              |
|------------------------|------|----------------------------------------------------------------------------------------------------------------------------------------------------------|---------------------|---------------------------------------------------------------------------------------------------------------------------------------------------------------------------------------|------------------|-------------------------------------------------------------|-----------------------------------|------------------------------------------------------------------------------------------|--------------------------------------------------------------------------------------------------------------------------------------------------------------------------------------------------------------------------------------------------------------------------------------------------------------------------------------------------------------------------------------------------------------|
| Patz JA, et al.        | 2007 | Climate change and global health: Quantifying a growing ethical crisis                                                                                   | Eco Health          | Provide overview of climate change manifestation and populations who will be most affected                                                                                            | Review undefined | 0-18; general population; focus on under 5 child population | Global                            | Undefined; rising temperatures                                                           | Malaria, malnutrition, diarrhoea                                                                                                                                                                                                                                                                                                                                                                             |
| Philipsborn RP, et al. | 2018 | Climate change and global child health                                                                                                                   | Pediatrics          | Overview of climate change manifestation and populations who will be most affected                                                                                                    | Review undefined | 0-18                                                        | Global                            | Warming, rising sea levels, increasing natural disasters, air pollution, desertification | Heat stress, malnutrition, diarrhoea, vector-borne diseases, allergies                                                                                                                                                                                                                                                                                                                                       |
| Rylander C, et al.     | 2013 | Climate change and the potential effects on maternal and pregnancy outcomes: an assessment of the most vulnerable - the mother, fetus, and newborn child | Global Health       | Review how climate change will increase the risk of infant and maternal mortality, birth complications, and poorer reproductive health, especially in tropical, developing countries. | Review undefined | Pregnant women, the developing fetus, and young children    | Tropical and developing countries | Global warming & extreme weather events                                                  | Infant mortality, preterm birth, low birth weight, malnutrition & stunting, diarrhoea, malaria,                                                                                                                                                                                                                                                                                                              |
| Sheffield, et al.      | 2011 | Global Climate Change and Children's Health: Threats and Strategies for Prevention                                                                       | Env Health Perspect | Review the projected impacts of climate change on children's health, the pathways involved in these effects, and prevention strategies.                                               | Review undefined | Fetus & 0-18                                                | Global                            | Warming, extreme weather events, rising sea levels, air pollution                        | Vector-borne diseases such as malaria and dengue; increased diarrheal and respiratory disease; increased morbidity and mortality from extreme weather; changed exposures to toxic chemicals; worsened poverty; food and physical insecurity; and threats to human habitation. Heat-related health effects for which research is emerging include diminished school performance, increased rates of pregnancy |

|                 |      |                                                                                                                                                           |                                        |                                                                                                                                                                                |                                |                                  |        |                                                                         |                                                                                                 |
|-----------------|------|-----------------------------------------------------------------------------------------------------------------------------------------------------------|----------------------------------------|--------------------------------------------------------------------------------------------------------------------------------------------------------------------------------|--------------------------------|----------------------------------|--------|-------------------------------------------------------------------------|-------------------------------------------------------------------------------------------------|
|                 |      |                                                                                                                                                           |                                        |                                                                                                                                                                                |                                |                                  |        |                                                                         | complications, and renal effects.                                                               |
| Anderko et al.  | 2020 | Climate changes reproductive and children's health: a review of risks, exposures and impacts                                                              | Pediatric research                     | Provide an overview of research exploring the impact of climate change on children's health impacts, as well as provide recommendations for pediatric research moving forward. | Review undefined               | Fetal & perinatal periods & 0-18 | Global | Warming, extreme weather events, rising sea levels, air pollution (CO2) | Asthma, allergies, vector-borne diseases, malnutrition, low birth weight, post-traumatic stress |
| Chersich et al. | 2020 | Associations between high temperatures in pregnancy and risk of preterm birth, low birth weight, and stillbirths: systematic review and meta-analysis     | BMJ                                    | Assess whether exposure to high temperatures in pregnancy is associated with increased risk for preterm birth, low birth weight, and stillbirth.                               | Systematic review & m/analysis | Perinatal                        | Global | Increased temperatures, heat waves                                      | Preterm birth, birth weight, and stillbirths                                                    |
| Clemens et al.  | 2020 | Report of the intergovernmental panel on climate change: implications for the mental health policy of children and adolescents in Europe—a scoping review | European Child & Adolescent Psychiatry | Summarize evidence on direct and indirect pathways of climate change on child and adolescent mental health                                                                     | Review undefined               | 0-18                             | Global | Warming & natural disasters                                             | Mental health, post-traumatic stress disorder                                                   |

|                           |      |                                                                                                                           |                         |                                                                                                                                                           |                                   |                         |        |                                                                                               |                                                                                                   |
|---------------------------|------|---------------------------------------------------------------------------------------------------------------------------|-------------------------|-----------------------------------------------------------------------------------------------------------------------------------------------------------|-----------------------------------|-------------------------|--------|-----------------------------------------------------------------------------------------------|---------------------------------------------------------------------------------------------------|
| Lieber et al.             | 2020 | A systematic review and meta-analysis assessing the impact of droughts, flooding, and climate variability on malnutrition | Global Public Health    | Summarize evidence on relationship between climate change and malnutrition                                                                                | Systematic review & meta-analysis | 0-18                    | Global | Droughts, flooding and climate variability (CC proxies)                                       | Malnutrition (wasting, stunting, or underweight)                                                  |
| Wooldridge G and Murthy S | 2020 | Pediatric critical care and the climate emergency: Our responsibilities and a call for change                             | Frontiers in Pediatrics | Explore impact of climate change on pediatric critical care (PCC) and focusing on the health care sector's impact on CC (vicious circle?)                 | Review                            | 0-18                    | Global | Warming, extreme weather events                                                               | Critical illness related to heat stress, vector-borne disease, diarrhoea, malnutrition, pneumonia |
| Olson and Metz            | 2020 | Climate change is a major stressor causing poor pregnancy outcomes and child development                                  | Faculty Reviews         | Explore relationship between prenatal maternal stress (PNMS) and paternal stress, allostatic load, and the degradation of the environment on individuals. | Review undefined                  | Fetal, perinatal & 0-18 | Global | Warming, air & land pollution, extreme weather events, rising sea levels, ocean acidification | Preterm birth, low birth weight, mental health problems                                           |

**Table S2.** Search Terms from Scoping Review.**1. Medline**

1. exp Climate Change/
2. Greenhouse Effect/
3. exp Hot Temperature/
4. exp Natural Disasters/

- 
5. (avalanche\* or climate change\* or cyclonic storm\* or drought\* or greenhouse effect\* or extreme heat or heat wave\* or hot temperature\* or flood\* or global warming or landslide\* or natural disaster\* or sea level rise\* or tidal wave\* or tornado\* or weather or wildfire\*).ti,ab,kf.
  6. or/1-5
  7. Adolescent Health/
  8. Child Health/
  9. Child Welfare/
  10. Child Mortality/
  11. Infant Health/
  12. Infant Welfare/
  13. exp Infant Mortality/
  14. Adolescent/
  15. exp Child/
  16. exp Infant/
  17. (adolescen\* or boy\* or child\* or girl\* or infant\* or juvenile\* or minor\* or neonatal\* or newborn\* or pediatric\* or paediatric\* or preschool\* or toddler\* or teen\* or youth\* or young\*).ti,ab,kf.
  18. or/7-17
  19. Health Status/
  20. Health Status Disparities/
  21. Social Determinants of Health/
  22. exp Socioeconomic Factors/
  23. ((economic\* or health or social\* or socio\*) adj3 (condition\* or determinant\* or disadvant\* or disparit\* or effect\* or factor\* or inequit\* or inequalit\* or status)).ti,ab,kf.
  24. (poverty or underdevelop\*).ti,ab,kf.
  25. or/19-24
  26. Mental Health/
  27. Anxiety/
  28. Depression/
  29. Adaptation, Psychological/
  30. Resilience, Psychological/

31. Psychological Trauma/

32. Stress, Psychological/

33. ((anxiety or coping or depression or emotional distress or mental health) adj7 (adolescen\* or boy\* or child\* or girl\* or infant\* or juvenile\* or minor\* or neonatal\* or newborn\* or pediatric\* or paediatric\* or preschool\* or toddler\* or teen\* or youth\* or young\*)).ti,ab,kf.

34. ((psych\* or mental) adj3 (adaptation or effect\* or resilience or stress or trauma or wellbeing or well-being) adj7 (adolescen\* or boy\* or child\* or girl\* or infant\* or juvenile\* or minor\* or neonatal\* or newborn\* or pediatric\* or paediatric\* or preschool\* or toddler\* or teen\* or youth\* or young\*)).ti,ab,kf.

35. or/26-34

36. 25 or 35

37. 6 and 18 and 36

38. 37 not (animals not humans).sh.

39. Review.pt.

40. Systematic Review.pt.

41. review\*.ti.

42. or/39-41

43. 38 and 42

## 2. Embase

('climate change'/exp OR 'greenhouse effect'/de OR 'high temperature'/de OR avalanche\*:ti,ab,kw OR 'climate change\*:ti,ab,kw OR 'cyclonic storm\*:ti,ab,kw OR drought\*:ti,ab,kw OR 'greenhouse effect\*:ti,ab,kw OR 'extreme heat':ti,ab,kw OR 'heat wave\*:ti,ab,kw OR 'hot temperature\*:ti,ab,kw OR flood\*:ti,ab,kw OR 'global warming':ti,ab,kw OR landslide\*:ti,ab,kw OR 'natural disaster\*:ti,ab,kw OR 'sea level rise\*:ti,ab,kw OR 'tidal wave\*:ti,ab,kw OR tornado\*:ti,ab,kw OR weather:ti,ab,kw OR wildfire\*:ti,ab,kw)

AND

('adolescent health'/de OR 'child health'/de OR 'child welfare'/exp OR 'childhood mortality'/de OR 'infant welfare'/de OR 'infant mortality'/de OR 'adolescent'/de OR 'child'/exp OR 'infant'/exp OR adolescen\*:ti,ab,kw OR boy\*:ti,ab,kw OR child\*:ti,ab,kw OR girl\*:ti,ab,kw OR infant\*:ti,ab,kw OR juvenile\*:ti,ab,kw OR minor\*:ti,ab,kw OR neonatal\*:ti,ab,kw OR newborn\*:ti,ab,kw OR pediatric\*:ti,ab,kw OR paediatric\*:ti,ab,kw OR preschool\*:ti,ab,kw OR toddler\*:ti,ab,kw OR teen\*:ti,ab,kw OR youth\*:ti,ab,kw OR young\*:ti,ab,kw)

AND

('health status'/de OR 'health disparity'/de OR 'social determinants of health'/de OR 'socioeconomics'/exp OR (((economic\* OR health OR social\* OR socio\*) NEAR/3 (condition\* OR determinant\* OR disadvant\* OR disparit\* OR effect\* OR factor\* OR inequit\* OR inequalit\* OR status)):ti,ab,kw) OR poverty:ti,ab,kw OR underdevelop\*:ti,ab,kw OR 'mental health'/exp OR 'anxiety'/de OR 'depression'/de OR 'adolescent depression'/de OR 'coping behavior'/de OR 'psychological resilience'/de OR 'psychotrauma'/de OR 'mental stress'/de OR (((anxiety OR coping OR depression OR 'emotional distress' OR 'mental health') NEAR/7 (adolescen\* OR boy\* OR child\* OR girl\* OR infant\* OR juvenile\* OR minor\* OR neonatal\* OR newborn\*



OR pediatric\* OR paediatric\* OR preschool\* OR toddler\* OR teen\* OR youth\* OR young\*)):ti,ab,kw) OR (((psych\* OR mental) NEAR/3 (adaptation OR effect\* OR resilience OR stress OR trauma OR wellbeing OR 'well being') NEAR/7 (adolescen\* OR boy\* OR child\* OR girl\* OR infant\* OR juvenile\* OR minor\* OR neonatal\* OR newborn\* OR pediatric\* OR paediatric\* OR preschool\* OR toddler\* OR teen\* OR youth\* OR young\*)):ti,ab,kw))

NOT ([animals]/lim NOT [humans]/lim)

AND ([article]/lim OR [article in press]/lim OR [review]/lim)

AND [review]/lim

### 3. Web of Science Core Collection

#1 TOPIC: ((avalanche\* or "climate change\*" or "cyclonic storm\*" or drought\* or "greenhouse effect\*" or "extreme heat" or "heat wave\*" or "hot temperature\*" or flood\* or "global warming" or landslide\* or "natural disaster\*" or "sea level rise\*" or "tidal wave\*" or tornado\* or weather or wildfire\*))

AND

#2 TOPIC: ((adolescen\* or boy\* or child\* or girl\* or infant\* or juvenile\* or minor\* or neonatal\* or newborn\* or pediatric\* or paediatric\* or preschool\* or toddler\* or teen\* or youth\* or young\*))

AND

#3 TOPIC: (((economic\* or health or social\* or socio\*) NEAR/3 (condition\* or determinant\* or disadvant\* or disparit\* or effect\* or factor\* or inequit\* or inequalit\* or status)))) OR TOPIC: ((poverty or underdevelop\*)) OR TS=(((anxiety or coping or depression or "emotional distress or mental health") NEAR/7 (adolescen\* or boy\* or child\* or girl\* or infant\* or juvenile\* or minor\* or neonatal\* or newborn\* or pediatric\* or paediatric\* or preschool\* or toddler\* or teen\* or youth\* or young\*))) OR TS=(((psych\* or mental) NEAR/3 (adaptation or effect\* or resilience or stress or trauma or wellbeing or well-being)) NEAR/7 (adolescen\* or boy\* or child\* or girl\* or infant\* or juvenile\* or minor\* or neonatal\* or newborn\* or pediatric\* or paediatric\* or preschool\* or toddler\* or teen\* or youth\* or young\*)))

#4 #1 AND #2 AND #3 Refined by: DOCUMENT TYPES: ( ARTICLE OR CORRECTION OR REVIEW OR EARLY ACCESS )

#5 #1 AND #2 AND #3 DOCUMENT TYPES: ( REVIEW )

### 5. Psychinfo

1. exp climate change/

2. heat effects/

3. exp natural disasters/

4. (avalanche\* or climate change\* or cyclonic storm\* or drought\* or greenhouse effect\* or extreme heat or heat wave\* or hot temperature\* or flood\* or global warming or landslide\* or natural disaster\* or sea level rise\* or tidal wave\* or tornado\* or weather or wildfire\*).ti,ab,id.

5. or/1-4

6. adolescent health/
7. child welfare/
8. (adolescen\* or boy\* or child\* or girl\* or infant\* or juvenile\* or minor\* or neonatal\* or newborn\* or pediatric\* or paediatric\* or preschool\* or toddler\* or teen\* or youth\* or young\*).ti,ab,id.
9. or/6-8
10. health status/
11. health disparities/
12. exp socioeconomic status/
13. ((economic\* or health or social\* or socio\*) adj5 (condition\* or determinant\* or disadvant\* or disparit\* or effect\* or factor\* or inequit\* or inequalit\* or status)).ti,ab,id.
14. (poverty or underdevelop\*).ti,ab,id.
15. or/10-14
16. exp mental health/
17. exp emotional states/
18. coping behavior/
19. "resilience (psychological)"/
20. emotional trauma/
21. psychological stress/
22. ((anxiety or coping or depression or emotional distress or mental health) adj7 (adolescen\* or boy\* or child\* or girl\* or infant\* or juvenile\* or minor\* or neonatal\* or newborn\* or pediatric\* or paediatric\* or preschool\* or toddler\* or teen\* or youth\* or young\*).ti,ab,id.
23. ((psych\* or mental) adj3 (adaptation or effect\* or resilience or stress or trauma or wellbeing or well-being) adj7 (adolescen\* or boy\* or child\* or girl\* or infant\* or juvenile\* or minor\* or neonatal\* or newborn\* or pediatric\* or paediatric\* or preschool\* or toddler\* or teen\* or youth\* or young\*).ti,ab,id.
24. or/16-23
25. 15 or 24
26. 5 and 9 and 25
27. 26 not (animals not humans).sh.
28. review\*.ti.
29. 26 and 28
